# Supplementary material
Source: publisher figshare collection journal article supplement (https://acs.figshare.com/ndownloader/files/4264039)
Supplement: Supplementary file 1 [file 4264039]

**Supporting Information for**

**Uncertainties Influencing Health-based Prioritization**

**of Ozone Abatement Options**

*Antara Digar<sup>1\*</sup>, Daniel S. Cohan<sup>1</sup> and Michelle L. Bell<sup>2</sup>*

<sup>1</sup>Department of Civil and Environmental Engineering, Rice University, Houston,  
TX 77005, USA

<sup>2</sup>Yale School of Forestry and Environmental Studies, New Haven,  
CT 06511, USA

\*Corresponding author: [antara@rice.edu](mailto:antara@rice.edu)

Number of pages: 06

Number of Figures: 05

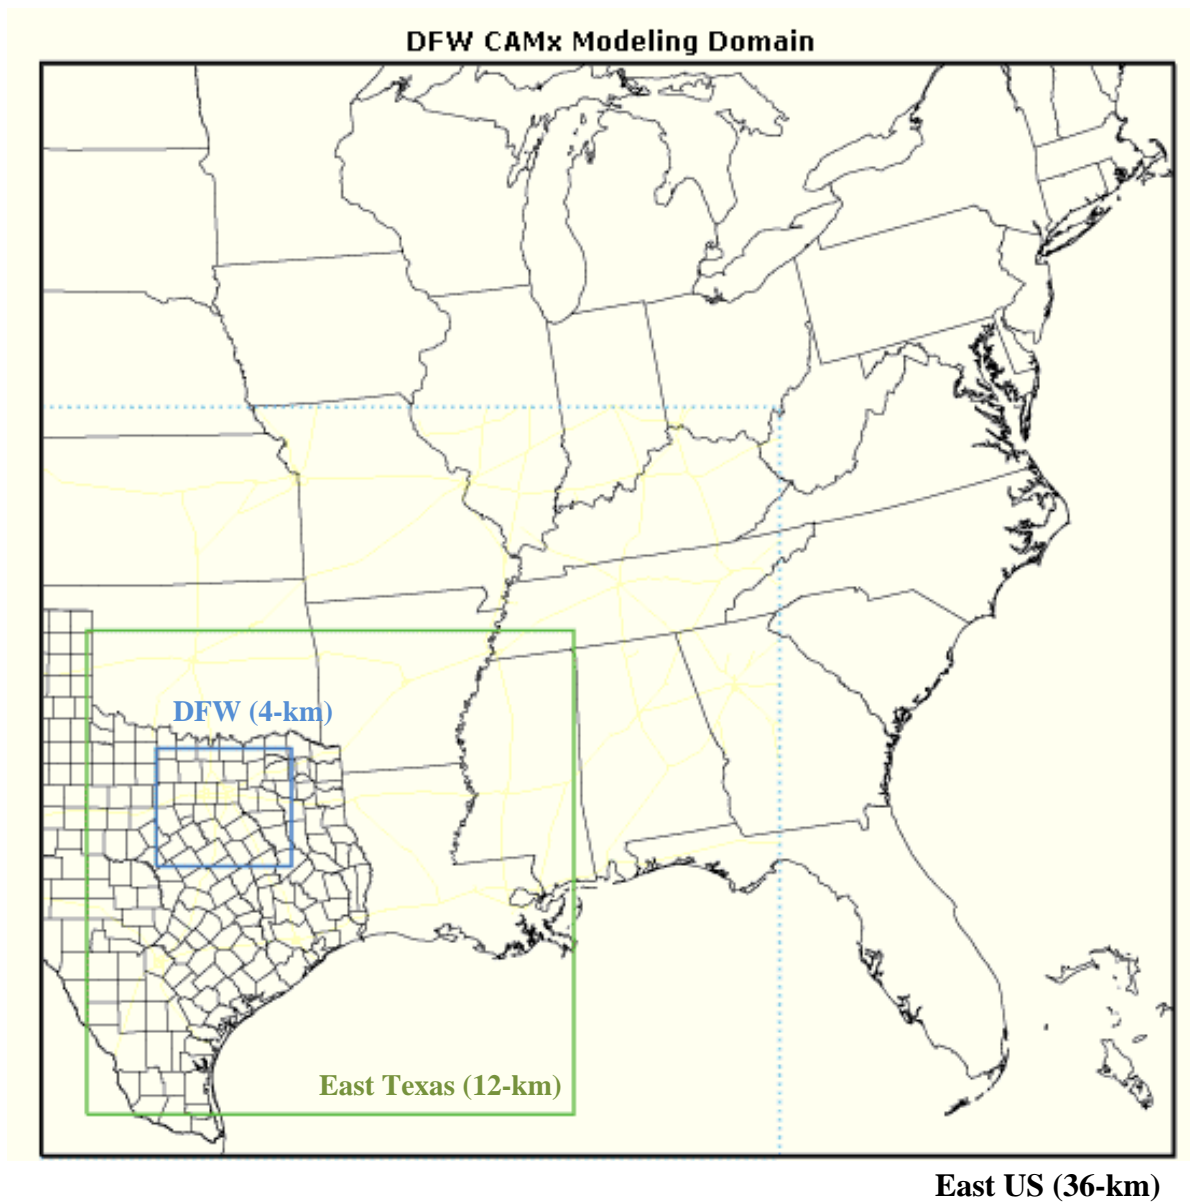

**Figure S-1. CAMx Modeling Domain used for the study. [Source: TCEQ]**

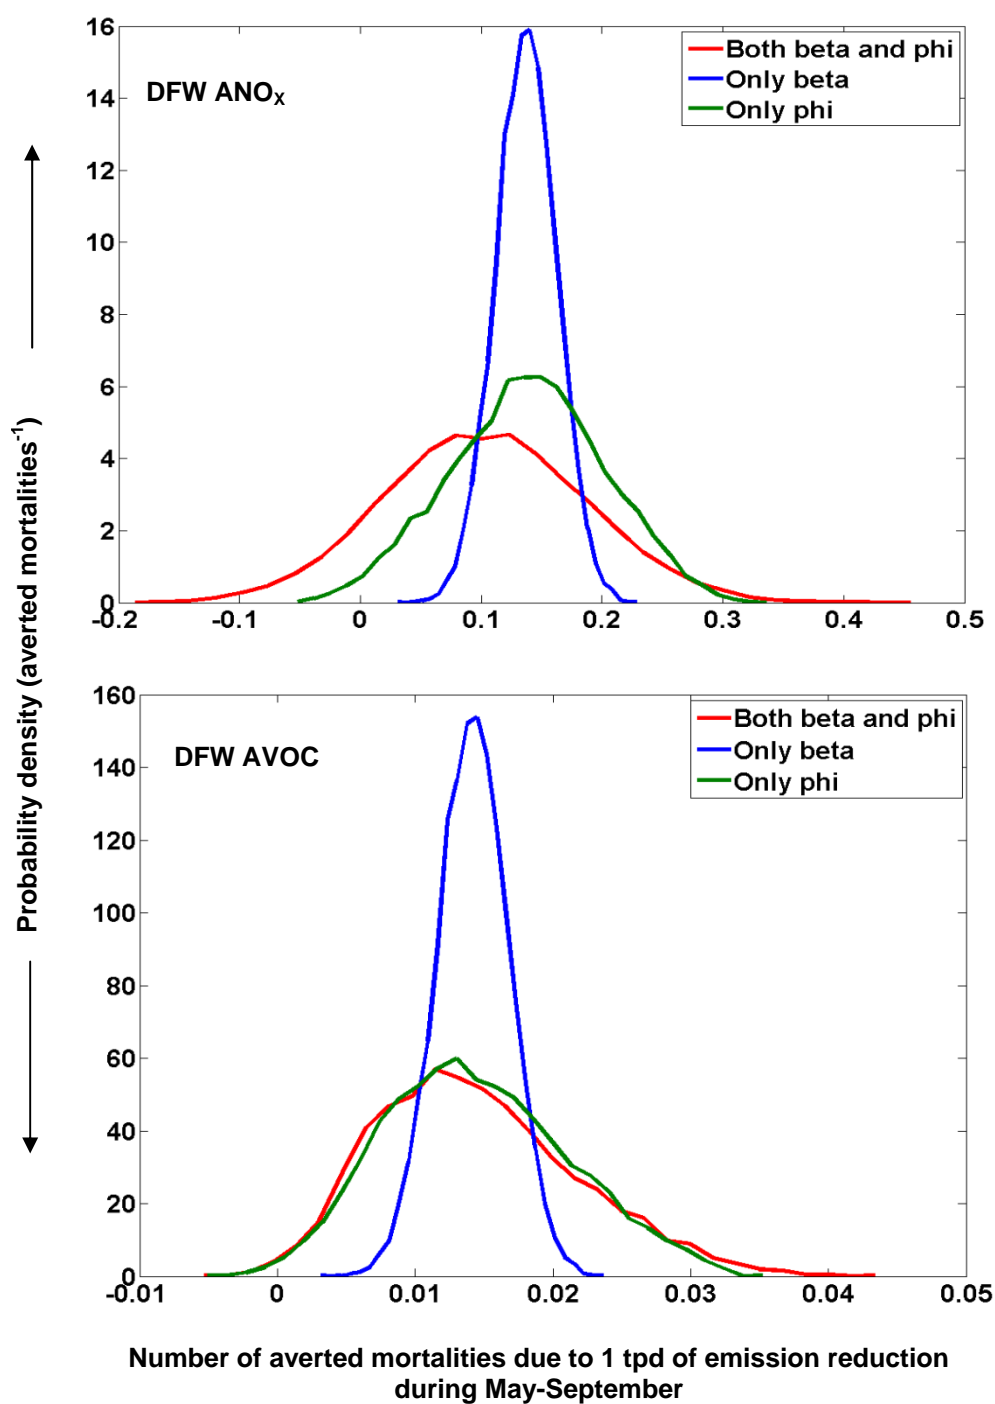

**Figure S-2. Probability density of averted premature mortalities per ozone season per ton per day reduction in anthropogenic NO<sub>x</sub> or VOC emission from DFW under uncertain phi and/or beta. Modeling results are shown for 8-h O<sub>3</sub> metrics, averaged over the episode and integrated over the domain for the base-case simulation.**

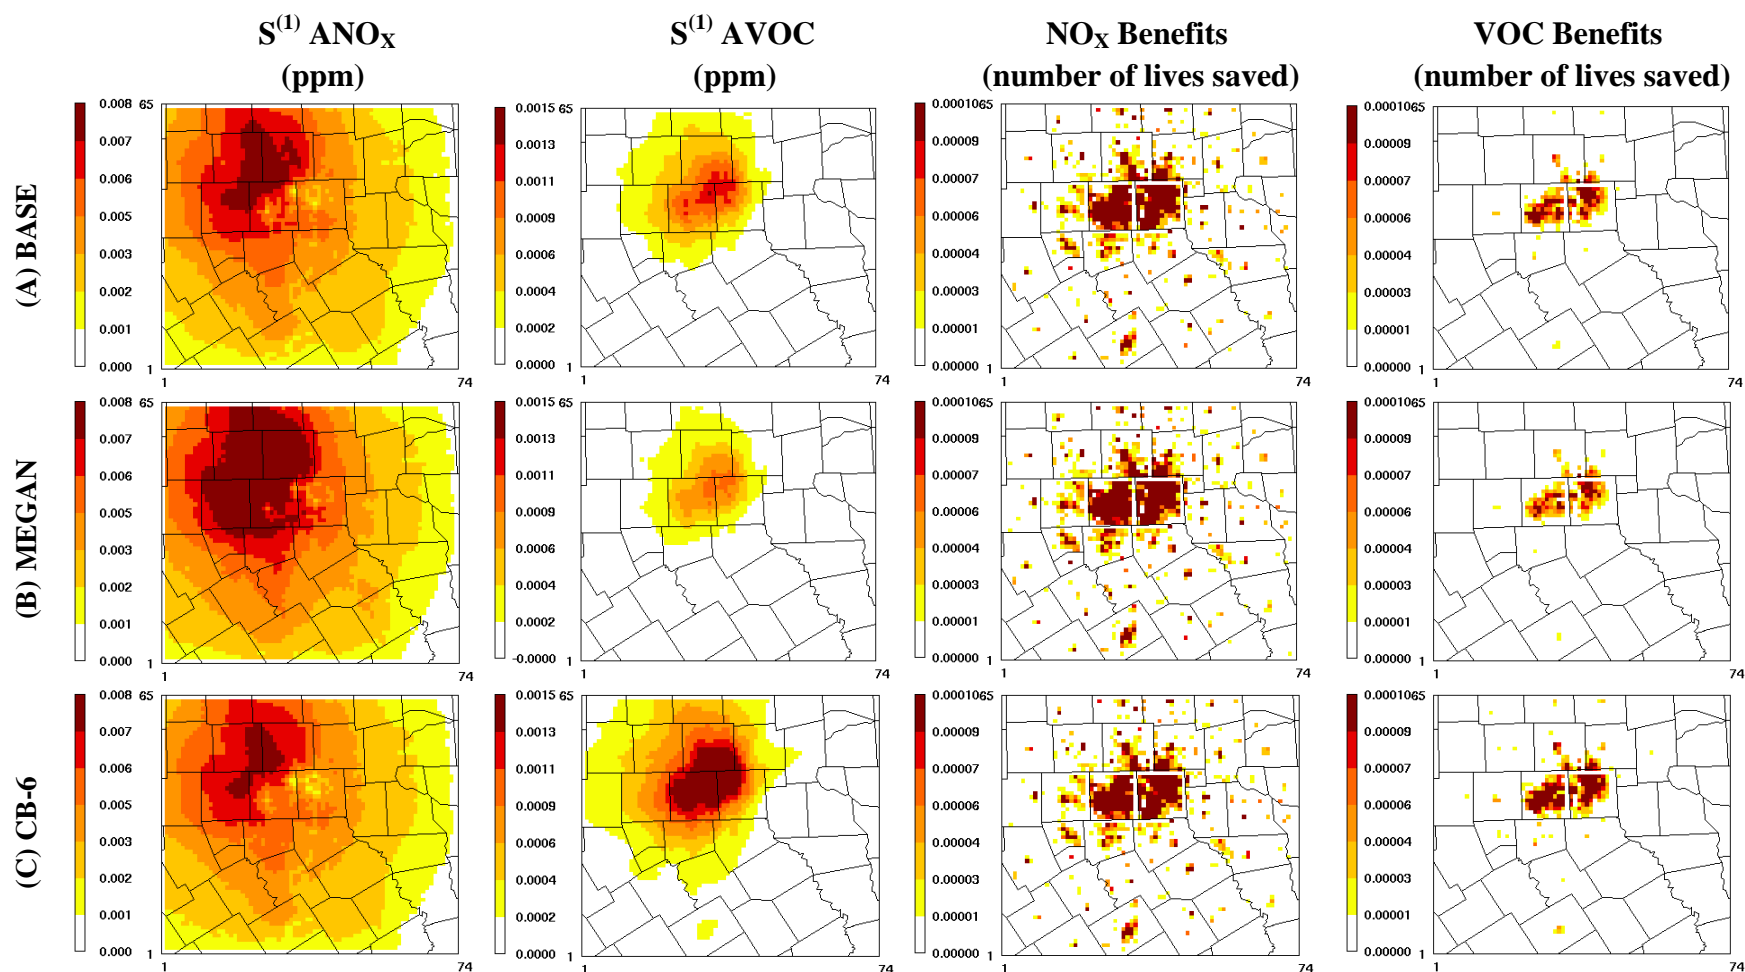

Figure S-3. Max 8-h O<sub>3</sub> sensitivity to DFW emission and health benefits (averted mortalities) per ton of reduction in NO<sub>x</sub> or VOCs for each of the 3 structural model scenarios when inputs are considered to be perfectly known. Episode average results are shown for the 4-km DFW sub-domain.

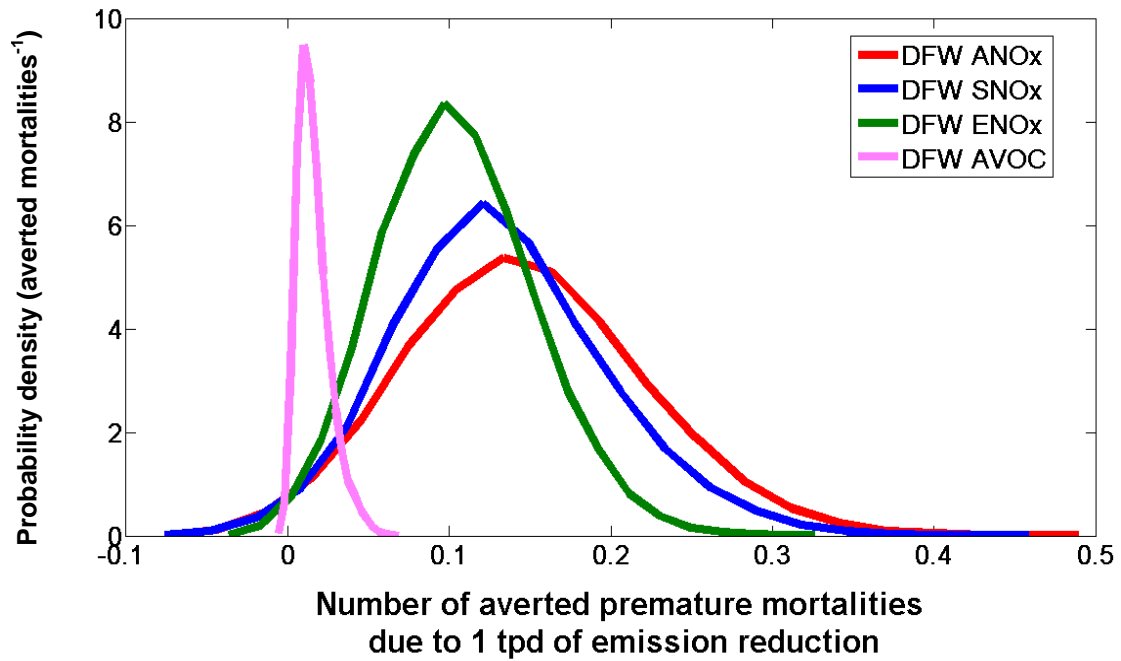

**Figure S-4. Health Impacts of 8-h ozone reduction due to NO<sub>x</sub> and VOC controls from DFW (9-county), considering uncertainties in photochemical modeling and in the health response relationship.**

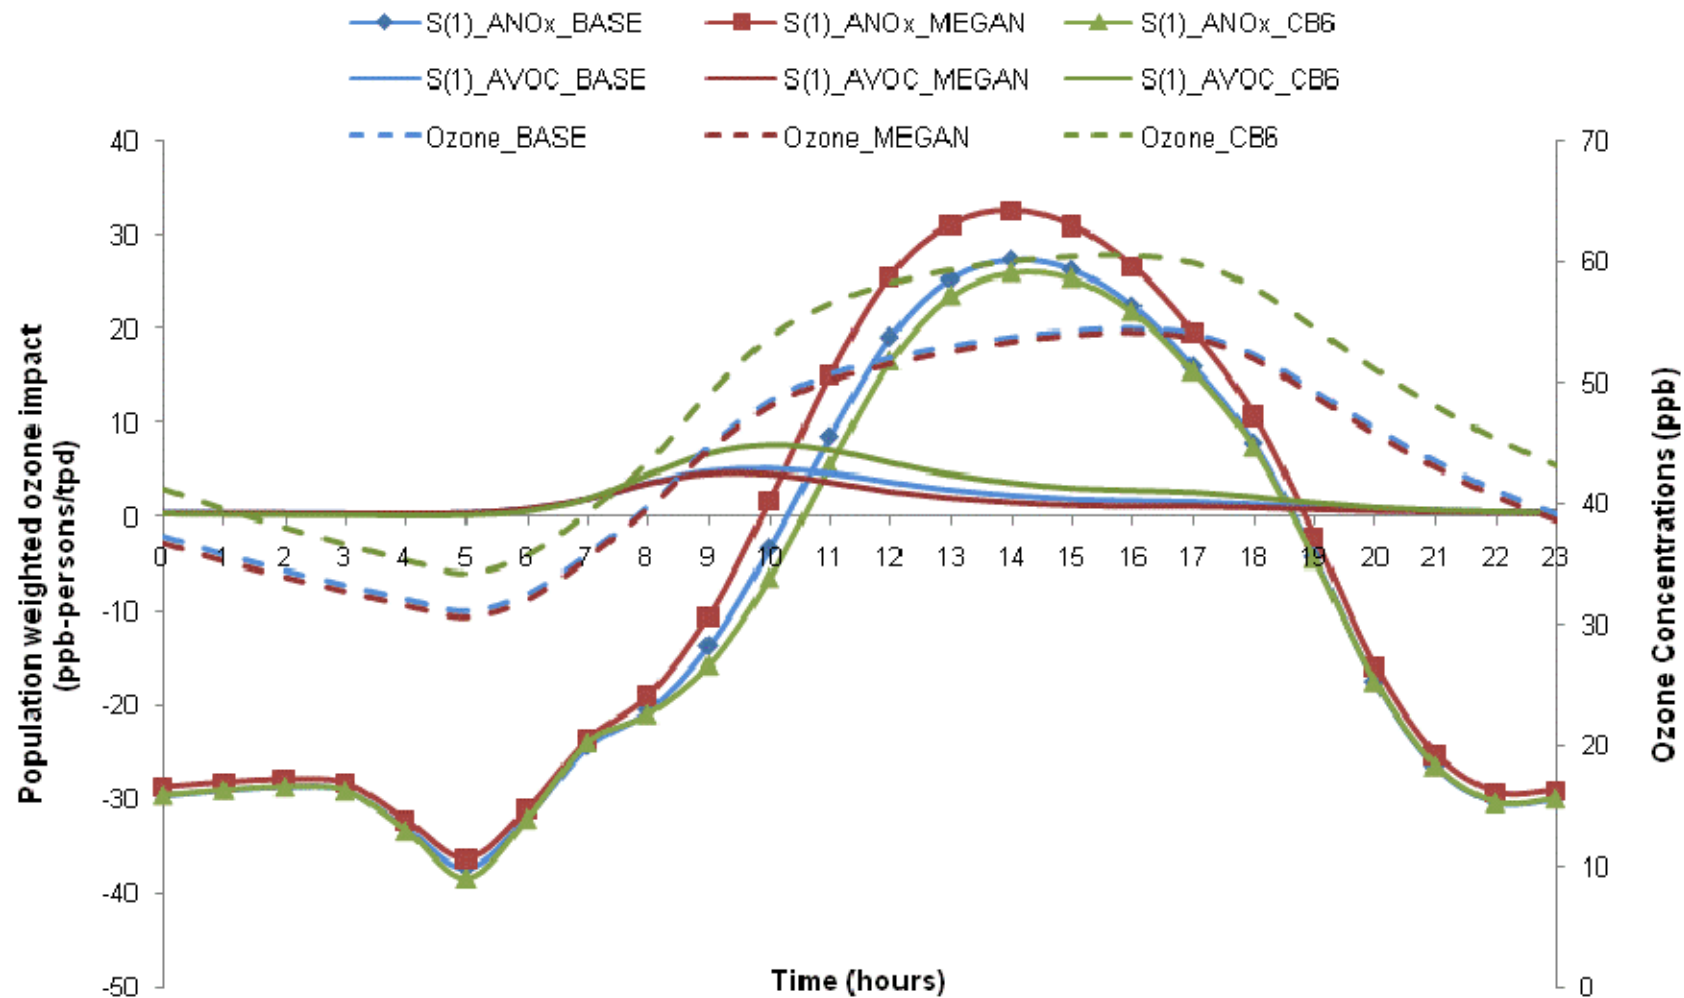

**Figure S-5. Diurnal profile of ozone concentrations and sensitivities for DFW sub-domain. Results are averaged over domain and episode.**
